# Supplementary material for: A conjugated polymer coupled with graphitic carbon nitride for boosting photocatalytic hydrogen generation under visible light
Source: Royal Society of Chemistry journal article supplement (doi:10.1039/d2se01660e), 2023-01-01
Supplement: d2se01660e1.pdf [file d2se01660e1.pdf]

## Supporting Information

### Conjugated Polymer Coupled with Graphitic Carbon Nitride for Boosting Photocatalytic Hydrogen Generation under Visible Light

*Xiaoyi Zhu, Meili Guan, Rongcai Gong, Xuezhong Gong, \* Chunhui Dai and Jianguo Tang\**

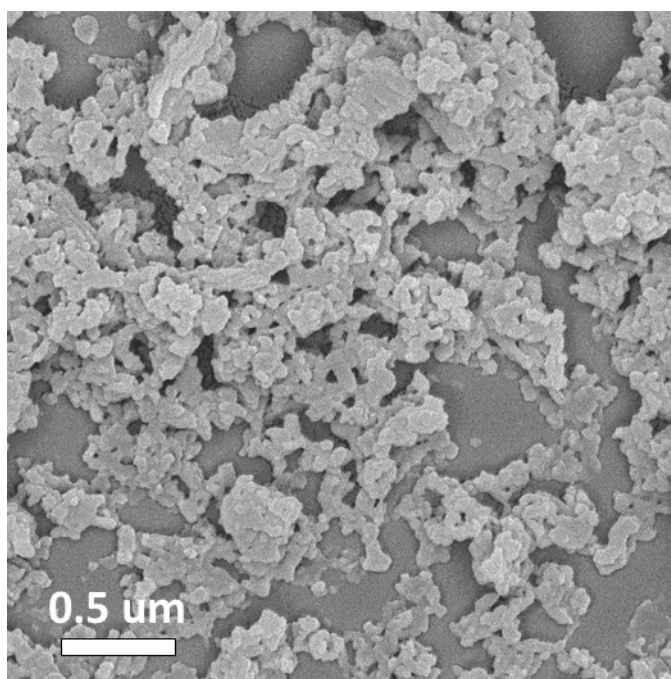

**Figure S1.** SEM image of synthesized C<sub>6</sub>-FDTP conjugated polymer. <sup>1</sup>H NMR (400 MHz, CDCl<sub>3</sub>): δ 8.19-8.13 (m, 1H), 7.99-7.86 (m, 3H), 7.76-7.57 (m, 2H), 2.14 (d, 3H), 1.26 (m, 7H), 0.89-0.71 (m, 6H). GPC results: M<sub>n</sub> = 4810; M<sub>w</sub> = 7310; PDI = 1.52. Anal. Calcd for C<sub>6</sub>-s (C<sub>43</sub>H<sub>52</sub>O<sub>2</sub>S)<sub>n</sub>: C, 81.60; H, 8.28; S, 5.07; Pd, 0.05%. Found: C, 78.11; H, 7.67; S, 4.18.

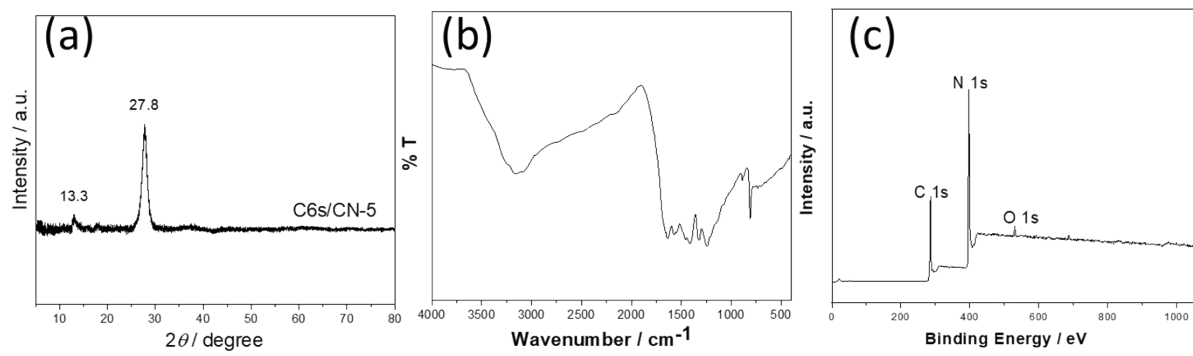

Figure S2. (a) XRD, (b)FTIR and (c)XPS of used C6s/CN-5 after 5-cycle photocatalytic tests

**Table S1.** Photocatalytic activity enhancement of conductive polymer/g-C<sub>3</sub>N<sub>4</sub> hybrids toward photocatalytic H<sub>2</sub> evolution.

| <b>Catalyst</b>                                        | <b>Cocatalyst Pt</b> | <b>Sacrificial agent</b>                                             | <b>Light source</b>                        | <b>Activity (umol h<sup>-1</sup> g<sup>-1</sup>)</b> | <b>Ref.</b> |
|--------------------------------------------------------|----------------------|----------------------------------------------------------------------|--------------------------------------------|------------------------------------------------------|-------------|
| <b>PEDOT/g-C<sub>3</sub>N<sub>4</sub>/Pt</b>           | 1 wt %               | TEOA (10 vol. %)                                                     | 300 W Xe lamp ( $\lambda > 400$ nm)        | 32.7                                                 | Ref. 1      |
| <b>PMDA/g-C<sub>3</sub>N<sub>4</sub>/Pt</b>            | 1 wt%                | Methanol (10 vol. %)                                                 | 300 W Xe lamp ( $\lambda \geq 420$ nm)     | 20.6                                                 | Ref. 2      |
| <b>Ppy/g-C<sub>3</sub>N<sub>4</sub></b>                | 3 wt %               | DI water                                                             | 300 W Xe lamp ( $\lambda \geq 400$ nm)     | 385.15                                               | Ref. 3      |
| <b>g-PAN/g-C<sub>3</sub>N<sub>4</sub>/Pt</b>           | 1.5 wt %             | TEOA (10 vol. %)                                                     | 300 W Xe lamp ( $\lambda \geq 400$ nm)     | 37.0                                                 | Ref. 4      |
| <b>P3HT/g-C<sub>3</sub>N<sub>4</sub>/Pt</b>            | 1 wt %               | Na <sub>2</sub> S (0.25 M) /Na <sub>2</sub> SO <sub>3</sub> (0.25 M) | 300 W Hg lamp ( $\lambda = 420 \pm 10$ nm) | ~550                                                 | Ref. 5      |
| <b>C<sub>6</sub>-FDBT/g-C<sub>3</sub>N<sub>4</sub></b> | 1 wt %               | TEOA (10 vol %)                                                      | 300 W Xe lamp ( $\lambda \geq 420$ nm)     | 495                                                  | This work   |

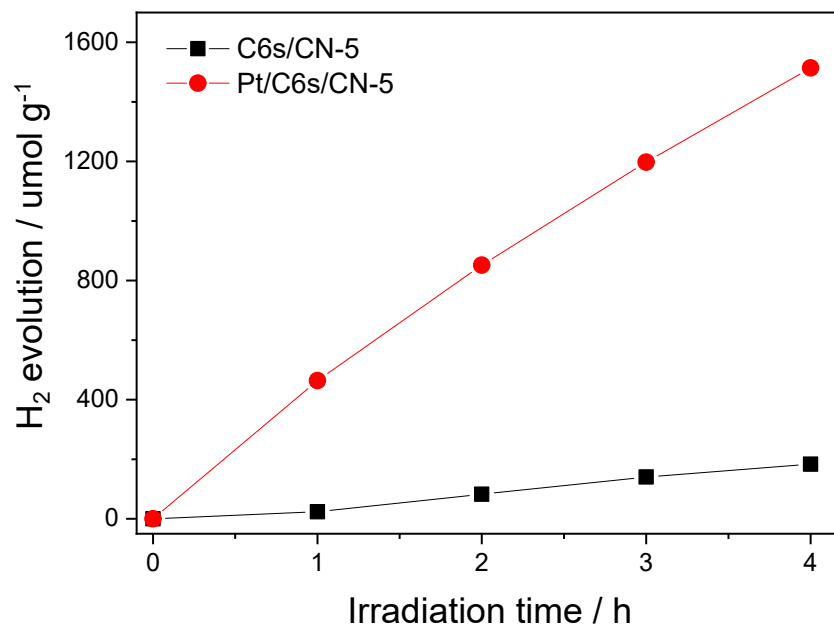

**Figure S3.** Photocatalytic H<sub>2</sub> generation over C6s/CN-5 and Pt/C6s/CN-5 hybridS under visible light irradiation.

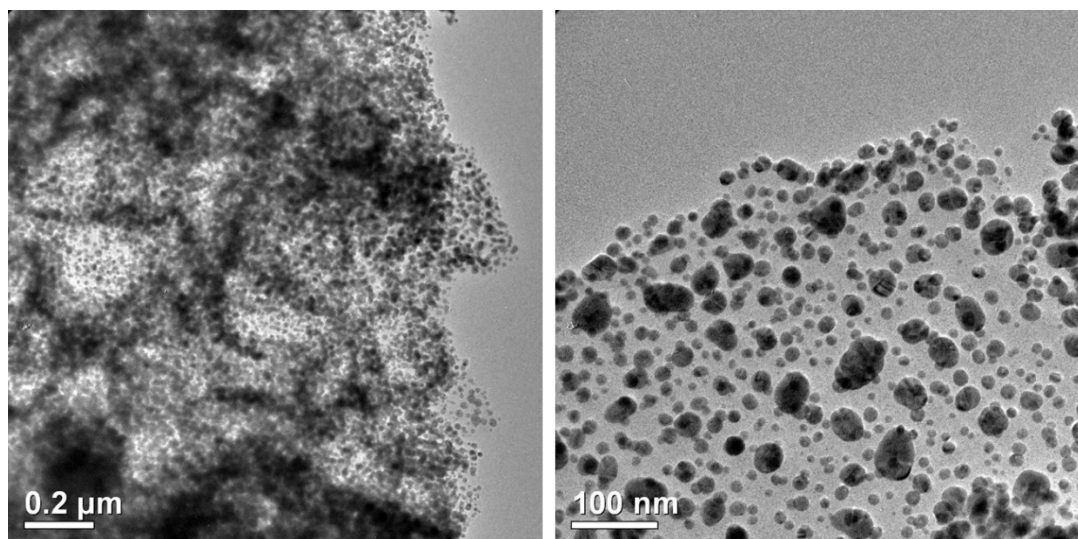

**Figure S4.** TEM images of Ag nanoparticles deposit on C6s/CN-X after visible light irradiation using  $\text{Ag}^+$  as photoelectrons scavengers.

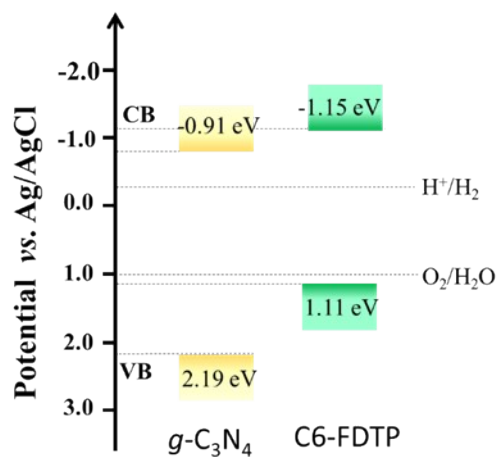

**Figure S5.** The band alignment of *g*-C<sub>3</sub>N<sub>4</sub> and C6-FDTP according to the calculated band positions.

**References:**

(1) Xing, Z.; Chen, Z.; Zong, X.; Wang, L. *Chem. Commun.* 2014, **50**, 6762–6764.

- (2) Chu, S.; Wang, Y.; Guo, Y.; Feng, J.; Wang, C.; Luo, W.; Fan, X.; Zou, Z. *ACS Catal.* 2013, **3**, 912–919.
- (3) Sui, Y.; Liu, J.; Zhang, Y.; Tian, X.; Chen, W. *Nanoscale* 2013, **5**, 9150–9155.
- (4) He, F.; Chen, G.; Yu, Y.; Hao, S.; Zhou, Y.; Zheng, Y. *ACS Appl. Mater. Interfaces* 2014, **6**, 7171–7179.
- (5) Yan, H.; Huang, Y. *Chem. Commun.* 2011, **47**, 4168–4170.
